# Supplementary material for: Long-Lasting Growth Hormone Regulated by the Ubiquitin-Proteasome System
Source: MDPI journal article supplement (doi:10.3390/ijms22126268), 2021-06-10
Supplement: s1 [file s1]

**A**

**A**

[illegible]

# B

## hGH

[illegible]

# AUT-hGH

[illegible]

# Supple Table S1

## Ubiquitination at K141 of hGH in serum

| #1 | b <sup>+</sup> | b <sup>2+</sup> | Seq. | y <sup>+</sup> | y <sup>2+</sup> | #2 |
|----|----------------|-----------------|------|----------------|-----------------|----|
| 1  | 88.03930       | 44.52329        | S    |                |                 | 21 |
| 2  | 187.10772      | 94.05750        | V    | 2289.13975     | 1145.07351      | 20 |
| 3  | 334.17613      | 167.59170       | F    | 2190.07134     | 1095.53931      | 19 |
| 4  | 405.21325      | 203.11026       | A    | 2043.00292     | 1022.00510      | 18 |
| 5  | 519.25617      | 260.13173       | N    | 1971.96581     | 986.48654       | 17 |
| 6  | 606.28820      | 303.64774       | S    | 1857.92288     | 929.46508       | 16 |
| 7  | 719.37227      | 360.18977       | L    | 1770.89086     | 885.94907       | 15 |
| 8  | 818.44068      | 409.72398       | V    | 1657.80679     | 829.40703       | 14 |
| 9  | 981.50401      | 491.25564       | Y    | 1558.73838     | 779.87283       | 13 |
| 10 | 1038.52547     | 519.76637       | G    | 1395.67505     | 698.34116       | 12 |
| 11 | 1109.56259     | 555.28493       | A    | 1338.65359     | 669.83043       | 11 |
| 12 | 1196.59461     | 598.80095       | S    | 1267.61647     | 634.31187       | 10 |
| 13 | 1311.62156     | 656.31442       | D    | 1180.58444     | 590.79586       | 9  |
| 14 | 1398.65359     | 699.83043       | S    | 1065.55750     | 533.28239       | 8  |
| 15 | 1512.69651     | 756.85189       | N    | 978.52547      | 489.76637       | 7  |
| 16 | 1611.76493     | 806.38610       | V    | 864.48254      | 432.74491       | 6  |
| 17 | 1774.82826     | 887.91777       | Y    | 765.41413      | 383.21070       | 5  |
| 18 | 1889.85520     | 945.43124       | D    | 602.35080      | 301.67904       | 4  |
| 19 | 2002.93926     | 1001.97327      | L    | 487.32386      | 244.16557       | 3  |
| 20 | 2116.02333     | 1058.51530      | L    | 374.23980      | 187.62354       | 2  |
| 21 |                |                 | K-GG | 261.15573      | 131.08150       | 1  |

## Supple Table S2

| Lysine(K)<br>residue position | The substitutes of hGH<br>with lysine converted to arginine |
|-------------------------------|-------------------------------------------------------------|
| 67                            | pCS4-Flag-hGH (K67R)                                        |
| 141                           | pCS4-Flag-hGH (K141R)                                       |
| 166                           | pCS4-Flag-hGH (K166R)                                       |
